# Supplementary material for: Cattle grazing as a driver of landscape revitalisation in the rural-urban interface subjected to agricultural abandonment
Source: Preprints.org preprint supplement (doi:10.20944/preprints202308.2182.v1), 2023-08-31
Supplement: Supplementary file 1 [file Bobiec et al._Land_SM1.xlsx]

## Sheet: Arkusz1
Elements of wood pasture's mosaic			Open grassland											Pioneering grove						Treed grassland					Riparian woods					Close-canopy woods
			Phytosociological releves
Species in herb layer	Species affiliation (phyt. class)	General vegetation type	1	2	3	4	5	6	7	8	9	10	11	12	13	14	15	16	17	18	19	20	21	22	23	24	25	26	27	28	29	30	31	32
Acer campestre	Querco-Fagetea	Deciduous forest														+				+			+
Acer negundo	unspecified	unspecified																												+
Acer pseudoplatanus	Querco-Fagetea	Deciduous forest																						+	+	+			+			+	+	+
Achillea millefolium	Molinio-Arrhenatheretea	Open grassland	1	1	+	1	+			1			1	2	2		1	1	+	+			+
Aegopodium podagraria	Querco-Fagetea	Deciduous forest				+							+										1	+	2				1	+	+		+
Agrimonia eupatoria	Trifolio-Geranietea sanguinei	Fringe shrubland		+		1			1		+				1	+		+	+
Agrostis capillaris	Nardo-Callunetea	Open grassland	2	2	2	2	+	2	3	3	2	1	3	4	3	4	4	3	3	+	3	2	2	1
Alchemilla vulgaris	Molinio-Arrhenatheretea	Open grassland																			+
Anemone nemorosa	Querco-Fagetea	Deciduous forest																												1	1	+		1
Angelica sylvestris	Molinio-Arrhenatheretea	Open grassland															+		+
Anthriscus sylvestris	Artemisietea vulgaris	Ruderal community									+		+																+
Arctium lappa	Artemisietea vulgaris	Ruderal community				+				+
Arrhenatherum elatius	Molinio-Arrhenatheretea	Open grassland
Athyrium filix-femina	unspecified	unspecified	+					+	+		1					+							+	+	+			+
Bellis perennis	Molinio-Arrhenatheretea	Open grassland																		1
Betula pendula	unspecified	unspecified
Bidens cernua	Bidentetea tripartiti	unspecified										+														+			+
Calamagrostis epigeios	Epilobietea angustifolii	Coniferous forest											+			1	1		+
Campanula patula	Molinio-Arrhenatheretea	Open grassland	+			+		+
Capsella bursa-pastoris	unspecified	unspecified								+
Carex hirta	Molinio-Arrhenatheretea	Open grassland	1							1											+			+
Carex ovalis	unspecified	unspecified																					+
Carex sylvatica	Querco-Fagetea	Deciduous forest										+
Carpinus betulus	Querco-Fagetea	Deciduous forest													1		1					+		+						+	+	+		+
Carum carvi	Molinio-Arrhenatheretea	Open grassland		+		+									+
Centaurea jacea	Molinio-Arrhenatheretea	Open grassland								+			+		+	+	+	+
Cerastium holosteoides	Molinio-Arrhenatheretea	Open grassland	+	+		+	+	+	+		+			+							+	+	+	1	+			+	+
Circaea lutetiana	Querco-Fagetea	Deciduous forest							+																		+			+		1	+	+
Cirsium arvense	Artemisietea vulgaris	Ruderal community		+	+								+
Cirsium vulgare	Artemisietea vulgaris	Ruderal community			+																		+		+			+					+
Corylus avellana	Querco-Fagetea	Deciduous forest																														1
Crepis biennis	Molinio-Arrhenatheretea	Open grassland		1																			+
Cruciata glabra	Querco-Fagetea	Deciduous forest
Cynosurus cristatus	Molinio-Arrhenatheretea	Open grassland		+		1			1	+	+		+							2				+
Dactylis glomerata	Molinio-Arrhenatheretea	Open grassland		+	+	+	+		+	1	+		1	+	1	1		+
Daucus carota	Molinio-Arrhenatheretea	Open grassland	+	+		+
Deschampsia caespitosa	Molinio-Arrhenatheretea	Open grassland	+	+		+				3			+			+	1	1	+								+
Dryopteris carthusiana	unspecified	unspecified										+												+		+			+		+	+
Dryopteris filix-mas	Querco-Fagetea	Deciduous forest	+						+								1		1			+												+
Elymus repens	Agropyretea intermedio-repentis	Ruderal community						+	+
Epilobium palustre	unspecified	unspecified									+						+										+	+	1
Epipactis helleborine	Querco-Fagetea	Deciduous forest																													+
Equisetum arvense	Agropyretea intermedio-repentis	Ruderal community		+				+													+
Equisetum palustre	Molinio-Arrhenatheretea	Open grassland																								1	+		+
Equisetum sylvaticum	unspecified	unspecified							+		+	+	+			+	1							+								+	+
Erigeron annuus	unspecified	unspecified	1	+	+	1	+	+	+		+									+			+							+			+
Fagus sylvatica	Querco-Fagetea	Deciduous forest																												+	+
Festuca pratensis	Molinio-Arrhenatheretea	Open grassland																		1
Festuca rubra	Molinio-Arrhenatheretea	Open grassland	2				1			+	2	2	2			1	2		1	1	+		1	+
Fragaria vesca	Epilobietea angustifolii	Coniferous forest						+	+							+	1														+		+	1
Frangula alnus	unspecified	unspecified	+					+									+								+				+
Fraxinus excelsior	Querco-Fagetea	Deciduous forest																										+
Galeobdolon luteum	Querco-Fagetea	Deciduous forest						+
Galeopsis tetrahit	Stellarietea mediae	Ruderal community
Galium aparine	Artemisietea vulgaris	Ruderal community									+	+																					+
Galium mollugo	Molinio-Arrhenatheretea	Open grassland	+							+						1	+	1				1
Geranium pratense	Molinio-Arrhenatheretea	Open grassland								+						+	+	1
Geranium robertianum	Artemisietea vulgaris	Ruderal community						+			+														1	+	+	+	1			1	+	+
Geum urbanum	Artemisietea vulgaris	Ruderal community	+					+	+		+	1				+	+				+	+		+	1	1	+	+	+	+		+	1	+
Glechoma hederacea	Artemisietea vulgaris	Ruderal community		+	2	+		+	+						1					+		1	+	1		+							+
Glechoma hirsuta	unspecified	unspecified																							1		+	1	+				1
Glyceria fluitans	Phragmitetea	Open grassland																									2	1	1
Gnaphalium uliginosum	Isoeto-Nanojuncetea	unspecified			+		+	+	+			+
Hedera helix	unspecified	unspecified	+																							+			1	+		+	1	1
Heracleum sphondylium	Molinio-Arrhenatheretea	Open grassland															+		+
Hieracium aurantiacum	Betulo-Adenostyletea	Ruderal community	+
Hieracium murorum	Quercetea robori-petraeae	Deciduous forest														+	+																	+
Hieracium pilosella	Nardo-Callunetea	Open grassland			1										+
Holcus lanatus	Molinio-Arrhenatheretea	Open grassland								+								+										+
Hypericum perforatum	unspecified	unspecified	+				+	1								1	+	1			+												+
Hypochaeris radicata	Koelerio glaucae-Corynephoretalia canescentis	Open grassland																						+	+			+
Impatiens glandulifera	Artemisietea vulgaris	Ruderal community																	+
Impatiens parviflora	Artemisietea vulgaris	Ruderal community																							+				+
Juncus bufonius	Isoeto-Nanojuncetea	unspecified		+	+			+	1	1	1	+		1	1			+
Juncus conglomeratus	Molinio-Arrhenatheretea	Open grassland								1								+
Lamium amplexicaule	Stellarietea mediae	Ruderal community						+
Leontodon autumnalis	Molinio-Arrhenatheretea	Open grassland	+	2					+	1			2	1	1				+	+	+		1	1
Leontodon hispidus	Molinio-Arrhenatheretea	Open grassland	+	2	+	+		+		+										1	+		+								+		+
Leucanthemum vulgare	Molinio-Arrhenatheretea	Open grassland	+	1	+	+	+
Lolium perenne	Molinio-Arrhenatheretea	Open grassland	4	4	3	3	3	4	2	3		1	+	3	2					2	1	+	2	1
Lotus corniculatus	Molinio-Arrhenatheretea	Open grassland
Luzula campestris	Nardo-Callunetea	Open grassland								+
Luzula pilosa	unspecified	unspecified																												+				+
Lychnis flos-cuculi	Molinio-Arrhenatheretea	Open grassland							+
Lysimachia nemorum	Querco-Fagetea	Deciduous forest																								+	+		+
Lysimachia nummularia	Molinio-Arrhenatheretea	Open grassland			1	2	+	2				1	1							2	+	2	1	1	1		+	1			1		+
Lysimachia vulgaris	Molinio-Arrhenatheretea	Open grassland	+						+	1	+	+	+	+		+		+	+	+			+	1								+
Maianthemum bifolium	unspecified	unspecified																												+	1		+	+
Matricaria inodora	Stellarietea mediae	Ruderal community					+
Medicago lupulina	unspecified	unspecified		2														+
Mentha arvensis	unspecified	unspecified							+
Mentha longifolia	Molinio-Arrhenatheretea	Open grassland																		+
Mycelis muralis	unspecified	unspecified																												+		1	+
Oxalis acetosella	unspecified	unspecified	+				+		+												+		+	+		+			+			+	+	+
Persicaria hydropiper	Bidentetea tripartiti	unspecified			+	+	1	+	1		2			+		1						1				+	1		1
Phleum pratense	Molinio-Arrhenatheretea	Open grassland														+			+
Pimpinella saxifraga	unspecified	unspecified		1											1			+
Plantago lanceolata	Molinio-Arrhenatheretea	Open grassland		1	+		+	+		1	+				1	1	+	1			+		1	+
Plantago major	Molinio-Arrhenatheretea	Open grassland	+	1	+	+	+	+	1		+	+	+		+		+		+	+				+									+
Poa annua	unspecified	unspecified			+		1		+		1									+
Poa nemoralis	Querco-Fagetea	Deciduous forest																							+					+
Poa pratensis	Molinio-Arrhenatheretea	Open grassland			2	1	2		1		2	2	1	2	2					1	1	+	1	1		+
Poa trivialis	Molinio-Arrhenatheretea	Open grassland			1	1			2				+	+				2	3	+	2	2	2	1	+	3	4	3	3				+
Polygonum aviculare	Stellarietea mediae	Ruderal community			+	+		+		+											+	+
Polygonum persicaria	unspecified	unspecified																+	1		+		1	+
Populus tremula	unspecified	unspecified												1		+										+			+	+	+			+
Potentilla anserina	Molinio-Arrhenatheretea	Open grassland																				+
Potentilla erecta	Nardo-Callunetea	Open grassland																				1
Prunella vulgaris	Molinio-Arrhenatheretea	Open grassland		2	+	1	+		+	2	+	+	+					1		+	+	+	+					1			+	1		+
Prunus avium	Querco-Fagetea	Deciduous forest																			+					+			+	+	+		+
Quercus robur	unspecified	unspecified					r							+			+					+	+	+						+	+		+	+
Ranunculus acris	Molinio-Arrhenatheretea	Open grassland	+	+	+	1	+			+	1	+	+		+				+	+	+		+			+		1
Ranunculus auricomus	Querco-Fagetea	Deciduous forest		+
Ranunculus repens	Molinio-Arrhenatheretea	Open grassland	2	1	+	2	1	+		2		+		1	3				2	2			+	1				2	1				1
Rorippa sylvestris	Molinio-Arrhenatheretea	Open grassland																		1								+
Rosa canina	Rhamno-Prunetea	Fringe shrubland	+					+
Rubus plicatus	Rhamno-Prunetea	Fringe shrubland	+				+	+	+			+										+		1
Rumex acetosa	Molinio-Arrhenatheretea	Open grassland	1	+					1					+				+			+
Rumex crispus	Molinio-Arrhenatheretea	Open grassland			+		1		+	+	+	+	+						+
Rumex hydrolapathum	Phragmitetea	Open grassland	+
Rumex obtusifolius	Artemisietea vulgaris	Ruderal community																							+		+
Salvia glutinosa	Querco-Fagetea	Deciduous forest														+
Sambucus nigra	Epilobietea angustifolii	Coniferous forest									+																				+	+
Sanicula europaea	Querco-Fagetea	Deciduous forest																												+		2	1	1
Scirpus sylvaticus	Molinio-Arrhenatheretea	Open grassland									r														+	3		+
Scrophularia nodosa	Querco-Fagetea	Deciduous forest			+
Solidago gigantea	Artemisietea vulgaris	Ruderal community											+
Solidago virgaurea	unspecified	unspecified		+	1		+		+							+							+	+
Sorbus aucuparia	unspecified	unspecified	+						+																								+
Stachys officinalis	Molinio-Arrhenatheretea	Open grassland																							+
Stachys palustris	Molinio-Arrhenatheretea	Open grassland																								+	+		+
Stellaria graminea	unspecified	unspecified															+				+			+		+		+	+			+	+
Stellaria media	Stellarietea mediae	Ruderal community							+		+								+
Tanacetum vulgare	Artemisietea vulgaris	Ruderal community	+										+
Taraxacum officinale	Molinio-Arrhenatheretea	Open grassland	+	+	+	1	1	2	+	+	2	2		+	+	1		1	1	1	2	+	+	1	+	+		+	+	+			+
Tilia cordata	Querco-Fagetea	Deciduous forest														+
Trifolium dubium	Molinio-Arrhenatheretea	Open grassland
Trifolium pratense	Molinio-Arrhenatheretea	Open grassland	+	+	+	+		+		1					+		+	+					+
Trifolium medium	Trifolio-Geranietea sanguinei	Fringe shrubland																					+
Trifolium repens	Molinio-Arrhenatheretea	Open grassland	2	3	3	2	3	2	2	1	2	1		2	2		3	2	2	+		1		1				+					+
Urtica dioica	Artemisietea vulgaris	Ruderal community				+		+	+	+	1	+							1			+		+		1		+	+				+
Valeriana officinalis	Molinio-Arrhenatheretea	Open grassland										+
Veronica beccabunga	Phragmitetea	Open grassland																								1	+		+
Veronica chamaedrys	unspecified	unspecified		1			+	+		+					1	1		+	1	1				+									+
Veronica hederifolia	Stellarietea mediae	Ruderal community						1																+
Veronica officinalis	Nardo-Callunetea	Open grassland	+	+								+				+							+				+
Viburnum opulus	Rhamno-Prunetea	Fringe shrubland																							+
Vicia tetrasperma	Stellarietea mediae	Ruderal community																													+
Viola reichenbachiana	Querco-Fagetea	Deciduous forest																								+		+	+				+	+
