# Supplementary material for: Cattle grazing as a driver of landscape revitalisation in the rural-urban interface subjected to agricultural abandonment
Source: Preprints.org preprint supplement (doi:10.20944/preprints202308.2182.v1), 2023-08-31
Supplement: Supplementary file 3 [file Bobiec et al._Land_SM3.docx]

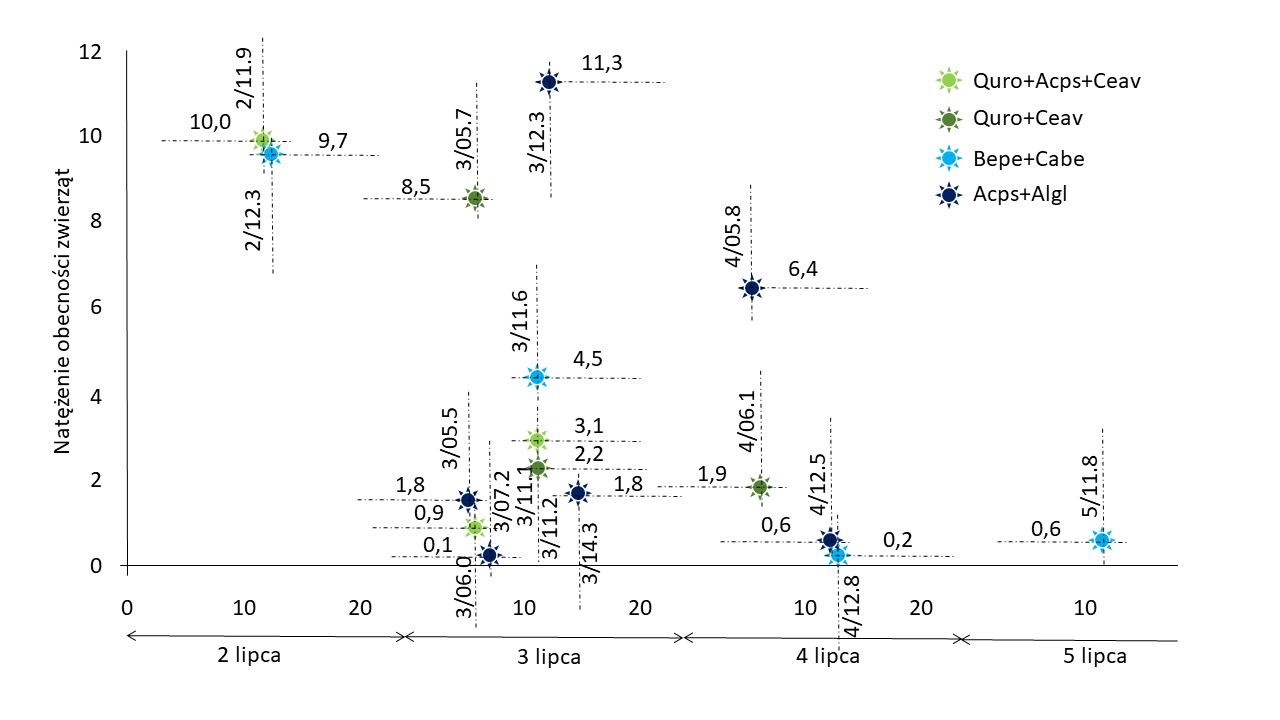

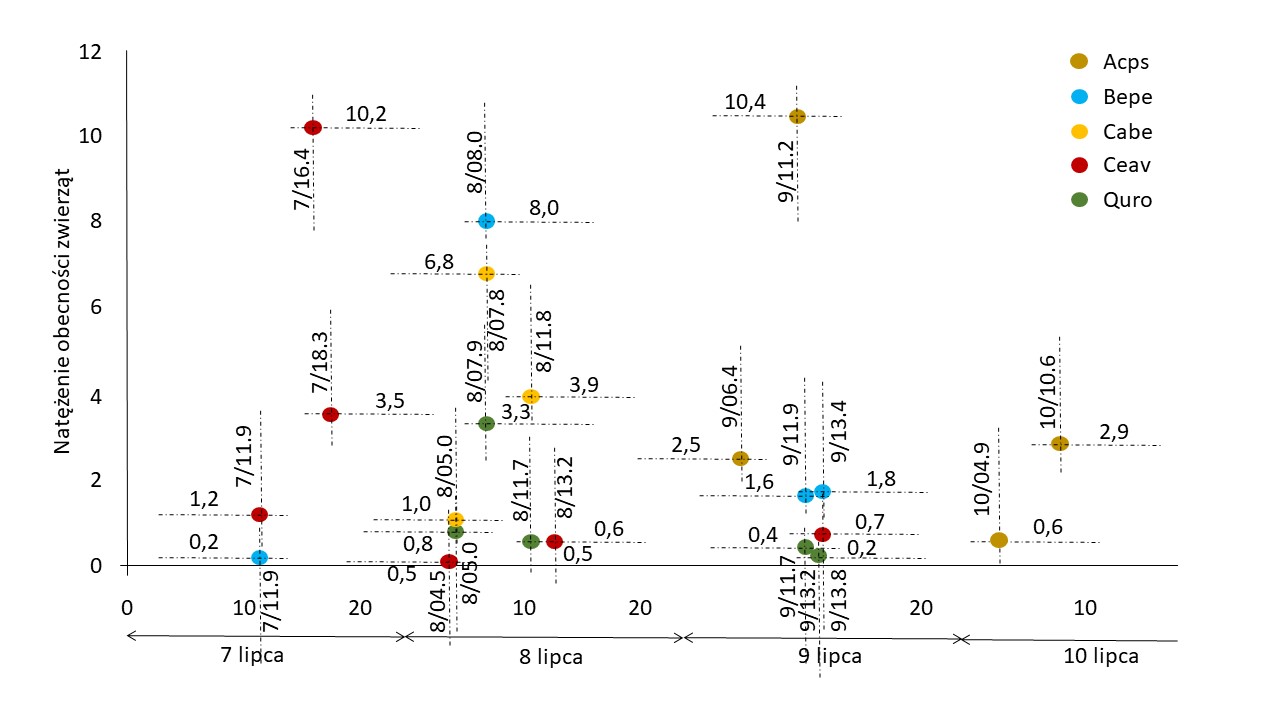


Dynamics of livestock temporal impact (LTIa) on stacks of tree branches (top panel) and felled whole crowns (bottom panel) based on phototrap record. Horizontal numbers - LTIa values, vertical numbers - the day in July 2020/median hour of particular livestock visit intervals; Qr – *Quercus robur*, Ca – *Cerasius avium*, Ap – *Acer pseudoplatanus*, Cb – *Carpinus betulus*, Bp – *Betula pendula*, Ag – *Alnus glutinosa*
